# Supplementary material for: Exploring the versatility of hydrogels derived from living organocatalytic ring-opening polymerization
Source: Royal Society of Chemistry journal article supplement (doi:10.1039/b920216a), 2010-01-01
Supplement: b920216a.pdf [file b920216a.pdf]

## Supplementary Data

# Exploring the Versatility of Hydrogels Derived from Living Organocatalytic Ring-Opening Polymerization

*Fredrik Nederberg<sup>1,2</sup>, Laetitia Mespouille<sup>6</sup>, Vivian Trang<sup>3</sup>, Russell C. Pratt<sup>1</sup>, Sung-Ho Kim<sup>1</sup>, John Colson<sup>4</sup>, Alshakim Nelson<sup>1</sup>, Philippe Dubois<sup>6</sup>, Curtis W. Frank<sup>5</sup>, and James L. Hedrick<sup>1,\*</sup>*

<sup>1</sup>IBM Almaden Research Center, 650 Harry Road, San Jose 95120 CA

<sup>2</sup>Department of Chemistry, Stanford University, Stanford 94305 CA

<sup>3</sup>Department of Chemistry, University of California, Berkeley, CA 94720

<sup>4</sup>Department of Chemistry and Biochemistry, University of Oklahoma, Norman 73069,

OK

<sup>5</sup>Department of Chemical Engineering, Stanford University, Stanford, CA 94305

<sup>6</sup> Laboratory of Polymeric and Composite Materials, University of Mons, B-7000 Mons,  
Belgium

Sample: FN VT8  
Size: 10.9400 mg  
Method: MDSC -90 to 100 heat-cool-heat

DSC

File: \\...\\Data\\QDSC\\Nederberg\\FN VT9.009  
Operator: TPM  
Run Date: 2007-06-30 22:07  
Instrument: DSC Q1000 V9.8 Build 296

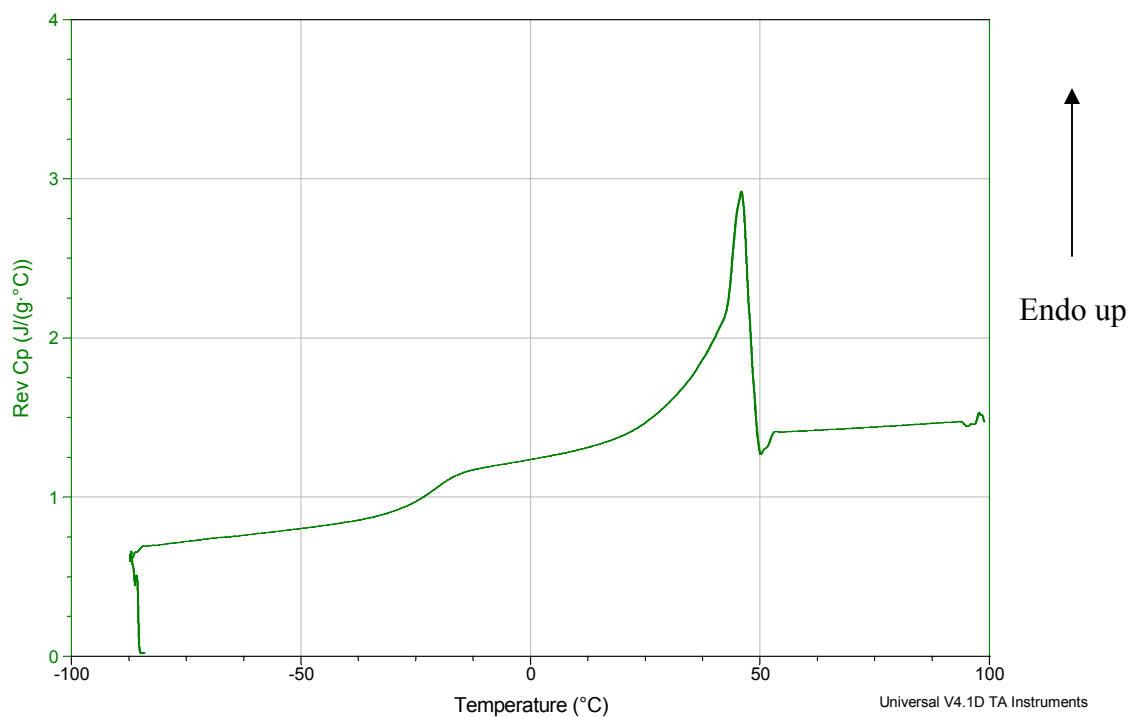

**Figure S1.** DSC curve of hydrogel added 50 eq of TMC. The melting of PEG is observed at  $\sim 45^{\circ}\text{C}$  and the glass transition  $T_g$  of PTMC at  $\sim -20^{\circ}\text{C}$ .

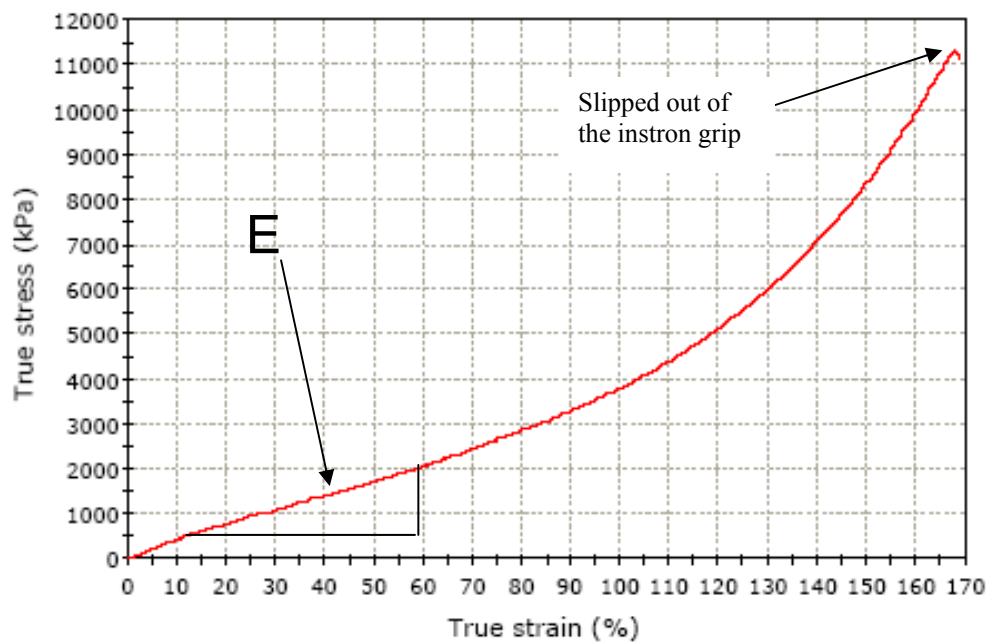

**Figure S2.** Stress-strain curve from 1:1 (PEG:PCL) co-macro monomer hydrogel, E-modules  $\sim 4.5$  MPa and strain  $\sim 170\%$  at point of release from grip.

Sample: FN VT25  
Size: 11.7800 mg  
Method: MDSC -90 to 100 heat-cool-heat

DSC

File: \\...\\Data\\QDSC\\Nederberg\\FN VT25.039  
Operator: TPM  
Run Date: 2007-08-17 01:37  
Instrument: DSC Q1000 V9.8 Build 296

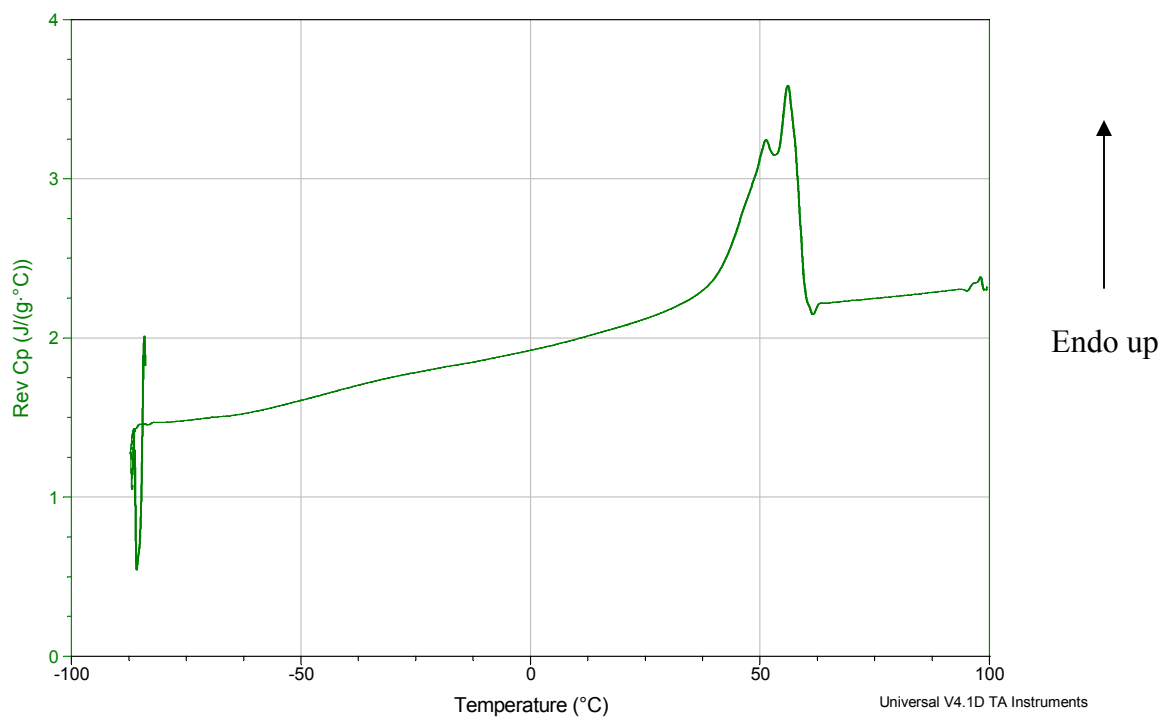

**Figure S3.** DSC curve of PCL:PEG co-macro monomer hydrogel. The melting of PEG and PCL is observed at  $\sim 50^{\circ}\text{C}$  and  $\sim 60^{\circ}\text{C}$  respectively, and glass transition temperature of PCL at  $\sim -55^{\circ}\text{C}$ .

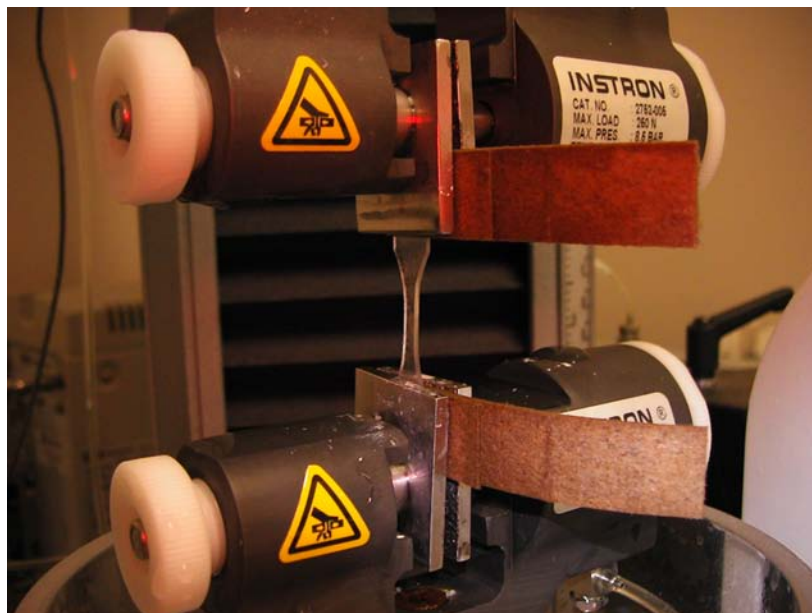

PNIPAAm cogel 25°C  
Before water bath

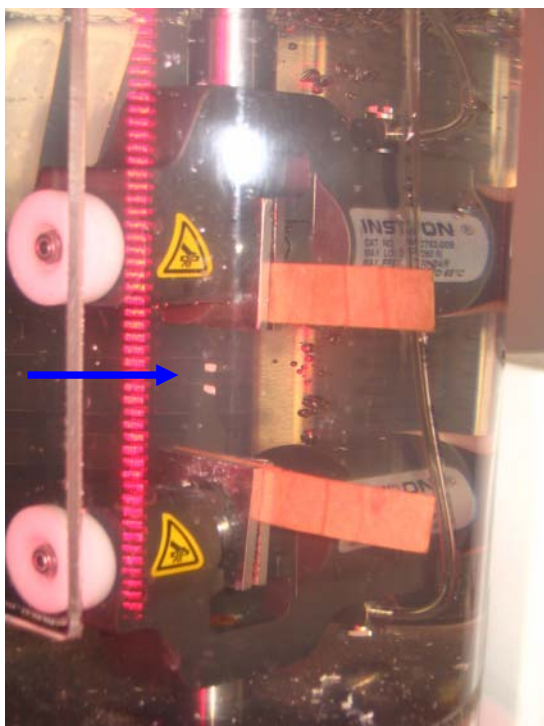

PNIPAAm cogel 25°C

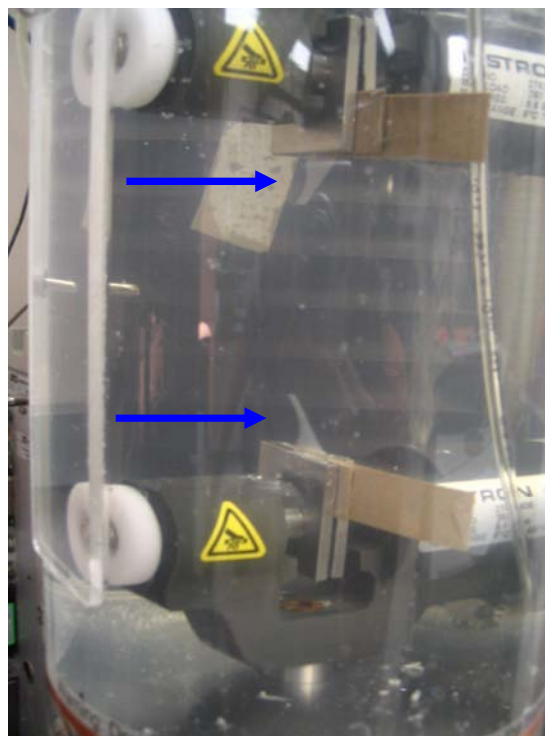

PNIPAAm cogel 37°C

→ = help arrow

**Figure S4.** Pictures of PNIPAAm co-hydrogels; prior introduction of water (top), below LCST and still intact at 25°C (below left) and above LCST and broken at 37°C (below right).

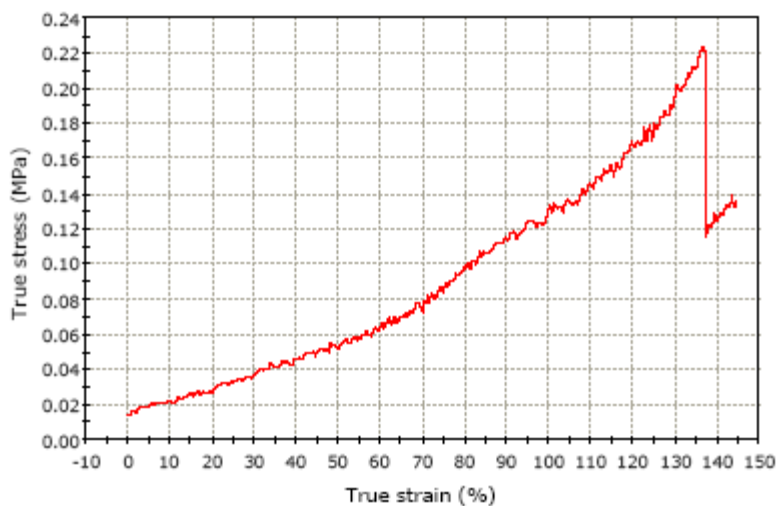

**Figure S5.** Stress-strain curve from typical PEG:P(MTC-pentylphenylurea) semi-interpenetrating network (SIPN).
